# Supplementary material
Source: publisher figshare collection journal article supplement (https://plos.figshare.com/articles/dataset/_/3914652)
Supplement: Supplementary file [file 1]

## SUPPORTING INFORMATION

Javier Estrada<sup>1,\*</sup>, Natalie Andrew<sup>2,\*</sup>, Daniel Gibson<sup>4</sup>, Frederick Chang<sup>3</sup>,  
Florian Gnad<sup>4,†</sup>, Jeremy Gunawardena<sup>4,§</sup>

<sup>1</sup>Departamento de Física de la Materia Condensada and Instituto Nicolás Cabrera,  
Universidad Autónoma de Madrid, Spain.

<sup>2</sup>Department of Organismic and Evolutionary Biology, Harvard University, Cambridge, MA, USA.

<sup>3</sup>Molecular and Cell Biology Graduate Program, Harvard University, Cambridge, MA, USA.

<sup>4</sup>Department of Systems Biology, Harvard Medical School, Boston, MA, USA.

\*These authors contributed equally.

<sup>†</sup>Current address: Genentech Inc, South San Francisco, CA, USA.

<sup>§</sup>Corresponding author; E-mail: [jeremy@hms.harvard.edu](mailto:jeremy@hms.harvard.edu)

### Abstract

This note provides supporting information for “*Cellular interrogation: exploiting cell-to-cell variability to discriminate regulatory mechanisms in oscillatory signalling*”. It should be read in conjunction with the paper, which provides further details. Software routines used in the paper are available on request.

## Contents

|                                                                                                       |           |
|-------------------------------------------------------------------------------------------------------|-----------|
| <b>1 Models of oscillatory <math>\text{Ca}^{2+}</math> spiking</b>                                    | <b>1</b>  |
| 1.1 General comments about the models . . . . .                                                       | 1         |
| 1.2 Meyer-Stryer—MST . . . . .                                                                        | 1         |
| 1.3 Goldbeter-Dupont-Berridge—GDB . . . . .                                                           | 3         |
| 1.4 Atri <i>et al</i> class 1—AT1 . . . . .                                                           | 4         |
| 1.5 Atri <i>et al</i> class 2—AT2 . . . . .                                                           | 6         |
| 1.6 Li-Rinzel class 1—LR1 . . . . .                                                                   | 8         |
| 1.7 Li-Rinzel class 2—LR2 . . . . .                                                                   | 10        |
| 1.8 Sneyd-LeBeau two and three state—SB2 and SB3 . . . . .                                            | 12        |
| 1.9 Hybrid AT1-based and LR1-based models . . . . .                                                   | 14        |
| <b>2 Supplementary Figures</b>                                                                        | <b>27</b> |
| <b>Microfluidic device and Chip-In-A-Dish.</b>                                                        | <b>28</b> |
| <b>ImageJ macro used for segmentation of cells after imaging.</b>                                     | <b>28</b> |
| <b>Image segmentation and <math>\text{Ca}^{2+}</math> trajectory generation.</b>                      | <b>29</b> |
| <b>Heterogeneity control for CIAD imaging.</b>                                                        | <b>29</b> |
| <b>Pseudo-code of the spike filtering and pattern search algorithms.</b>                              | <b>30</b> |
| <b>Flow chart and pseudo-code for choosing random ICs and PVs and determining the natural period.</b> | <b>31</b> |
| <b>Flow chart and pseudo-code for pattern counting.</b>                                               | <b>32</b> |
| <b>Absence of photobleaching.</b>                                                                     | <b>33</b> |
| <b>Flow chart and pseudo-code for nonlinear amplitude analysis.</b>                                   | <b>34</b> |
| <b>Effect of sample size on nonlinear frequency analysis under uniform sampling</b>                   | <b>35</b> |
| <b>Effect of sample size on nonlinear frequency analysis under lognormal sampling</b>                 | <b>36</b> |
| <b>Effect of sample size on nonlinear amplitude analysis under uniform sampling</b>                   | <b>37</b> |
| <b>Effect of sample size on nonlinear amplitude analysis under lognormal sampling</b>                 | <b>38</b> |

# 1 Models of oscillatory $\text{Ca}^{2+}$ spiking

## 1.1 General comments about the models

Eight models of oscillatory  $\text{Ca}^{2+}$  spiking were selected from the literature to cover a range of behaviours, as described in the Paper. The dynamical variables used in the various models are listed in Table 1 below. The differential equations for the models are listed in the sub-sections that follow, using the abbreviations

| species                              | variable      | units       |
|--------------------------------------|---------------|-------------|
| cytoplasmic calcium                  | $cc$          | $\mu M$     |
| ER calcium                           | $cer$         | $\mu M$     |
| $IP_3$                               | $p$           | $\mu M$     |
| fraction of active $IP_3$ receptors  | $n$           | <i>u.l.</i> |
| fraction of receptors in state $x$   | $x$           | <i>u.l.</i> |
| fraction of receptors in state $y$   | $y$           | <i>u.l.</i> |
| fraction of receptors in state $y_2$ | $y_2 = x + y$ | <i>u.l.</i> |

Table 1: Dynamical variables and their symbols and units; *u.l.* signifies an unitless number.

in Paper Figure 3. These equations follow the model descriptions in the original papers. Also listed in the accompanying table are the reference parameter values used in the original paper, at which the model exhibits limit cycle oscillations in response to step stimulation.

In the original papers, an input stimulation by hormone is regarded as varying one of the parameter values, so that the corresponding term in the equations is effectively taken to aggregate the effects of the hormone receptor and any downstream signalling between the receptor and the mechanism in which the parameter appears. We did not want to modify the original models and thereby make it difficult to compare our work to previous studies of calcium oscillation. We therefore chose to use the same approach. The input parameter for each model is flagged with an asterisk, \*, in the corresponding table of reference parameter values.

## 1.2 Meyer-Stryer—MST

This is from the 1988 paper by Meyer and Stryer, “*Molecular model for receptor-stimulated calcium spiking*” [4].

$$\begin{aligned}
 \frac{dp}{dt} &= k_+(cc) - k_-(p) \\
 \frac{dcer}{dt} &= J_2(cer, cc) - J_1(p, cer) \\
 \frac{dcc}{dt} &= J_1(p, cer) - J_2(cer, cc) - mitochondria(cc)
 \end{aligned}$$

$$\begin{aligned}
k_+(cc) &= \frac{c_4 R}{cc + k_3} \cdot cc \\
k_-(p) &= c_5 \cdot p \\
J_1(p, cer) &= \frac{c_1 \cdot cer \cdot p^3}{(k_1 + p)^3} \\
J_2(cer, cc) &= \frac{c_2 \cdot cc^2}{(cc + k_2)^2} - c_3 \cdot cer^2 \\
mitochondria(cc) &= c_6 \left( \frac{cc}{c_7} \right)^{3.3} - c_6
\end{aligned}$$

| parameter | original value                                       |
|-----------|------------------------------------------------------|
| $c_1$     | $6.64 \text{ s}^{-1}$                                |
| $k_1$     | $0.1 \text{ } \mu M$                                 |
| $c_2$     | $5 \text{ } \mu M \text{ s}^{-1}$                    |
| $k_2$     | $0.15 \text{ } \mu M$                                |
| $c_3$     | $3.13 \cdot 10^{-5} (\text{ } \mu M \text{ s})^{-1}$ |
| $c_4$     | $1 \text{ s}^{-1}$                                   |
| $k_3$     | $1 \text{ } \mu M$                                   |
| $c_5$     | $2 \text{ s}^{-1}$                                   |
| $c_6$     | $0.5 \text{ } \mu M \text{ s}^{-1}$                  |
| $c_7$     | $0.6 \text{ } \mu M$                                 |
| $R^*$     | $0.31 \text{ } \mu M$                                |

| variable | init. cond.           |
|----------|-----------------------|
| $p$      | $0.04 \text{ } \mu M$ |
| $cer$    | $40 \text{ } \mu M$   |
| $cc$     | $0.1 \text{ } \mu M$  |

Table 2: MST reference parameter values (left) and initial conditions (right) from [4].

### 1.3 Goldbeter-Dupont-Berridge—GDB

This is from the 1990 paper by Goldbeter, Dupont and Berridge, “*Minimal model for signal-induced Ca2+ oscillations and for their frequency encoding through protein phosphorylation*” [2].

$$\begin{aligned}\frac{dcer}{dt} &= v_2(cc) - v_3(cc, cer) - k_f \cdot cer \\ \frac{dcc}{dt} &= v_0 + v_1 \cdot b - v_2(cc) + v_3(cc, cer) + k_f \cdot cer - k \cdot cc\end{aligned}$$

$$\begin{aligned}v_2(cc) &= V_{M2} \cdot \frac{cc^2}{k_2^2 + cc^2} \\ v_3(cc, cer) &= V_{M3} \cdot \frac{cer^2}{K_R^2 + cer^2} \cdot \frac{cc^4}{K_A^4 + cc^4}\end{aligned}$$

| parameter | original value     |
|-----------|--------------------|
| $v_0$     | $1 \mu M s^{-1}$   |
| $k$       | $10 s^{-1}$        |
| $k_f$     | $1 s^{-1}$         |
| $v_1^*$   | $7.3 \mu M s^{-1}$ |
| $V_{M2}$  | $65 \mu M s^{-1}$  |
| $V_{M3}$  | $500 \mu M s^{-1}$ |
| $k_2$     | $1 \mu M$          |
| $K_R$     | $2 \mu M$          |
| $K_A$     | $0.9 \mu M$        |
| $b$       | $0.31 u.l.$        |

| variable | init. cond.  |
|----------|--------------|
| $cer$    | $0.25 \mu M$ |
| $cc$     | $1.5 \mu M$  |

Table 3: GDB reference parameter values (left) and initial conditions (right) from [2]

#### 1.4 Atri *et al* class 1—AT1

This is from the 1993 paper by Atri, Amundson, Clapham and Sneyd, “A single-pool model for intracellular calcium oscillations and waves in the *Xenopus laevis* oocyte” [1], with modifications for the class I/II distinction from the 2006 paper by Sneyd, Tsaneva-Atanasova, Reznikov, Bai, Sanderson and Yule, “A method for determining the dependence of calcium oscillations on inositol trisphosphate oscillations” [6].

$$\begin{aligned}\frac{dn}{dt} &= \frac{1}{\tau_n} \cdot (n_{inf}(cc) - n) \\ \frac{dp}{dt} &= ir \cdot (p_{st} - p) \\ \frac{dcer}{dt} &= J_{cc} - J_{IP3} \\ \frac{dcc}{dt} &= J_{IP3} - J_{cc} + \delta(J_{in} - J_{out})\end{aligned}$$

$$\begin{aligned}J_{cc} &= \frac{\gamma_2 \cdot cc}{k_{\gamma_2} + cc} \\ J_{IP3} &= k_{flux} \mu(p) \cdot n \left( b + \frac{V_1 cc}{k_1 + cc} \right) (\gamma \cdot cer - cc) \\ J_{in} &= \beta_1 + \beta_2 \cdot p_{st} \\ J_{out} &= \frac{\gamma_1 cc^2}{k_{\gamma_1}^2 + cc^2} \\ n_{inf}(cc) &= 1 - \frac{cc^2}{k_2^2 + cc^2} \\ \mu(p) &= \mu_0 + \frac{\mu_1 \cdot p}{k_\mu + p}\end{aligned}$$

| parameter      | original value     |
|----------------|--------------------|
| $p_{st}^*$     | $10 \mu M$         |
| $\beta_1$      | $1 \mu M s^{-1}$   |
| $\beta_2$      | $0.2 s^{-1}$       |
| $ir$           | $0.08 s^{-1}$      |
| $k_{flux}$     | $4.8 \mu M s^{-1}$ |
| $\delta$       | $0.01 u.l.$        |
| $\gamma_1$     | $24 \mu M s^{-1}$  |
| $\gamma_2$     | $20 \mu M s^{-1}$  |
| $k_{\gamma_1}$ | $0.4 \mu M$        |
| $k_{\gamma_2}$ | $0.06 \mu M$       |
| $\gamma$       | $5.405 \mu M^{-1}$ |
| $\tau_n$       | $2 s$              |
| $k_2$          | $0.7 \mu M$        |
| $b$            | $0.111 u.l.$       |
| $V_1$          | $0.889 u.l.$       |
| $k_1$          | $0.7 \mu M$        |
| $k_\mu$        | $4 \mu M$          |
| $\mu_0$        | $0.567 u.l.$       |
| $\mu_1$        | $0.433 u.l.$       |

| variable | init. cond.      |
|----------|------------------|
| $n$      | $0.986 u.l.$     |
| $p$      | $0 \mu M$        |
| $cer$    | $3.915194 \mu M$ |
| $cc$     | $0.083406 \mu M$ |

Table 4: AT1 reference parameter values (left) and initial conditions (right) from [6]

## 1.5 Atri *et al* class 2—AT2

This is also from the 1993 paper by Atri, Amundson, Clapham and Sneyd, “A *single-pool model for intracellular calcium oscillations and waves in the *Xenopus laevis* oocyte*” [1], with modifications for the class I/II distinction from the 2006 paper by Sneyd, Tsaneva-Atanasova, Reznikov, Bai, Sanderson and Yule, “A *method for determining the dependence of calcium oscillations on inositol trisphosphate oscillations*” [6].

$$\begin{aligned}\frac{dp}{dt} &= v_4 \left[ \frac{cc + (1 - \alpha)k_4}{cc + k_4} \right] - ir \cdot p \\ \frac{dcer}{dt} &= J_{cc} - J_{IP3} \\ \frac{dcc}{dt} &= J_{IP3} - J_{cc} + \delta(J_{in} - J_{out})\end{aligned}$$

$$\begin{aligned}J_{cc} &= \frac{\gamma_2 \cdot cc}{k_{\gamma_2} + cc} \\ J_{IP3} &= k_{flux}\mu(p) \cdot n_{inf}(cc) \left( b + \frac{V_1 cc}{k_1 + cc} \right) (\gamma \cdot cer - cc) \\ J_{in} &= \beta_1 + \beta_2 \cdot p_{st} \\ J_{out} &= \frac{\gamma_1 cc^2}{k_{\gamma_1}^2 + cc^2} \\ n_{inf}(cc) &= 1 - \frac{cc^2}{k_2^2 + cc^2} \\ \mu(p) &= \mu_0 + \frac{\mu_1 \cdot p}{k_\mu + p}\end{aligned}$$



| parameter      | original value     |
|----------------|--------------------|
| $v_4^*$        | $6 \mu M s^{-1}$   |
| $\beta_1$      | $1 \mu M s^{-1}$   |
| $\beta_2$      | $0.2 s^{-1}$       |
| $k_{flux}$     | $4.8 \mu M s^{-1}$ |
| $\alpha$       | $0.97 u.l.$        |
| $\delta$       | $0.01 u.l.$        |
| $\gamma_1$     | $24 \mu M s^{-1}$  |
| $\gamma_2$     | $20 \mu M s^{-1}$  |
| $k_{\gamma_1}$ | $0.4 \mu M$        |
| $k_{\gamma_2}$ | $0.06 \mu M$       |
| $\gamma$       | $5.405 \mu M^{-1}$ |
| $\tau_n$       | $2 s$              |
| $k_2$          | $0.7 \mu M$        |
| $b$            | $0.111 u.l.$       |
| $V_1$          | $0.889 u.l.$       |
| $k_1$          | $0.7 \mu M$        |
| $k_\mu$        | $4 \mu M$          |
| $\mu_0$        | $0.567 u.l.$       |
| $\mu_1$        | $0.433 u.l.$       |
| $k_4$          | $1.1 \mu M$        |
| $ir$           | $0.08 s^{-1}$      |

| variable                     | init. cond.      |
|------------------------------|------------------|
| $p$                          | $0 \mu M$        |
| $cer$                        | $3.915194 \mu M$ |
| $cc$                         | $0.083406 \mu M$ |
| $\mu_0$ and $b$ to $J_{IP3}$ |                  |

Table 5: AT2 reference parameter values (left) and initial conditions (right) from [6]

## 1.6 Li-Rinzel class 1—LR1

This is from the 1994 paper by Li and Rinzel, “*Equations for  $\text{InsP}_3$  receptor-mediated  $[\text{Ca}^{2+}]_i$  oscillations derived from a detailed kinetic model: a Hodgkin-Huxley like formalism*” [3], with modifications for the class I/II distinction from the 2006 paper by Sneyd, Tsaneva-Atanasova, Reznikov, Bai, Sanderson and Yule, “*A method for determining the dependence of calcium oscillations on inositol trisphosphate oscillations*” [6].

$$\begin{aligned}\frac{dn}{dt} &= A(K_d - (cc + K_d) \cdot n) \\ \frac{dp}{dt} &= ir \cdot (p_{st} - p) \\ \frac{dcer}{dt} &= J_{cc} - J_{IP3} - J_{noIP3} \\ \frac{dcc}{dt} &= J_{IP3} + J_{noIP3} - J_{cc} + eps \cdot (J_{in} - J_{out})\end{aligned}$$

$$\begin{aligned}J_{cc} &= \frac{V_e cc^2}{K_e^2 + cc^2} \\ J_{IP3} &= P \left( \frac{p \cdot n \cdot cc}{(p + K_i) \cdot (cc + K_a)} \right)^3 \cdot (\sigma^{-1} cer - cc) \\ J_{noIP3} &= L(\sigma^{-1} cer - cc) \\ J_{in} &= \alpha_1 + \alpha_2 \cdot p_{st} \\ J_{out} &= \frac{V_p cc^2}{K_p^2 + cc^2}\end{aligned}$$

| parameter  | original value              |
|------------|-----------------------------|
| $p_{st}^*$ | $0.8 \mu M$                 |
| $\alpha_1$ | $1 \mu M s^{-1}$            |
| $\alpha_2$ | $0.25 s^{-1}$               |
| $eps$      | $0.01 u.l.$                 |
| $ir$       | $0.02 s^{-1}$               |
| $L$        | $9.25 \cdot 10^{-3} s^{-1}$ |
| $P$        | $66.6 s^{-1}$               |
| $K_i$      | $1 \mu M$                   |
| $K_a$      | $0.4 \mu M$                 |
| $V_e$      | $1 \mu M s^{-1}$            |
| $K_e$      | $0.2 \mu M$                 |
| $A$        | $0.5 s^{-1}$                |
| $K_d$      | $0.4 \mu M$                 |
| $\sigma$   | $0.185 u.l.$                |
| $V_p$      | $5 \mu M s^{-1}$            |
| $K_p$      | $0.3 \mu M$                 |

| variable | init. cond.   |
|----------|---------------|
| $n$      | $0 u.l.$      |
| $p$      | $1.4 \mu M$   |
| $cer$    | $0.696 \mu M$ |
| $cc$     | $0.15 \mu M$  |

Table 6: LR1 reference parameter values (left) and initial conditions (right) from [6]

## 1.7 Li-Rinzel class 2—LR2

This is also from the 1994 paper by Li and Rinzel, “*Equations for  $\text{InsP}_3$  receptor-mediated  $[\text{Ca}^{2+}]_i$  oscillations derived from a detailed kinetic model: a Hodgkin-Huxley like formalism*” [3], with modifications for the class I/II distinction from the 2006 paper by Sneyd, Tsaneva-Atanasova, Reznikov, Bai, Sanderson and Yule, “*A method for determining the dependence of calcium oscillations on inositol trisphosphate oscillations*” [6].

$$\begin{aligned}
\frac{dp}{dt} &= v_4 \left[ \frac{cc + (1 - \alpha)k_4}{cc + k_4} \right] - ir \cdot p \\
\frac{dcer}{dt} &= J_{cc} - J_{IP3} - J_{noIP3} \\
\frac{dcc}{dt} &= J_{IP3} + J_{noIP3} - J_{cc} + eps \cdot (J_{in} - J_{out}) \\
J_{cc} &= \frac{V_e cc^2}{K_e^2 + cc^2} \\
J_{IP3} &= P \left( \frac{p \cdot n(cc) \cdot cc}{(p + K_i) \cdot (cc + K_a)} \right)^3 \cdot (\sigma^{-1} cer - cc) \\
J_{noIP3} &= L(\sigma^{-1} cer - cc) \\
J_{in} &= \alpha_1 + \alpha_2 \cdot p_{st} \\
J_{out} &= \frac{V_p cc^2}{K_p^2 + cc^2} \\
n(cc) &= \frac{K_d}{cc + K_d}
\end{aligned}$$

| parameter                              | original value              |
|----------------------------------------|-----------------------------|
| $v_4^*$                                | $0.7 \mu M s^{-1}$          |
| $\alpha$                               | $0.97 u.l.$                 |
| $k_4$                                  | $1.1 \mu M$                 |
| $ir$                                   | $0.02 s^{-1}$               |
| $\alpha_1$                             | $1 \mu M s^{-1}$            |
| $\alpha_2$                             | $0.25 s^{-1}$               |
| $eps$                                  | $0.01 u.l.$                 |
| $L$                                    | $9.25 \cdot 10^{-3} s^{-1}$ |
| $P$                                    | $66.6 s^{-1}$               |
| $K_i$                                  | $1 \mu M$                   |
| $K_a$                                  | $0.4 \mu M$                 |
| add $\mu_0$ and $b$ to $J_{IP3}$ $V_e$ | $1 \mu M s^{-1}$            |
| $K_e$                                  | $0.2 \mu M$                 |
| $A$                                    | $0.5 s^{-1}$                |
| $K_d$                                  | $0.4 \mu M$                 |
| $\sigma$                               | $0.185 u.l.$                |
| $V_p$                                  | $5 \mu M s^{-1}$            |
| $K_p$                                  | $0.3 \mu M$                 |

| variable | init. cond.   |
|----------|---------------|
| $p$      | $1.4 \mu M$   |
| $cer$    | $0.696 \mu M$ |
| $cc$     | $0.15 \mu M$  |

Table 7: LR2 reference parameter values (left) and initial conditions from [6]

## 1.8 Sneyd-LeBeau two and three state—SB2 and SB3

These are from the 2000 paper by Sneyd, LeBeau and Yule, “*Traveling waves of calcium in pancreatic acinar cells: model construction and bifurcation analysis*” [5].

**2 state:**

$$\begin{aligned}\frac{dy_2}{dt} &= \phi_3(cc)(1 - y_2) - \left( \frac{\phi_1(cc)\phi_2(cc)P}{\phi_1(cc)P + \phi_{-1}(cc)} \right) \cdot y_2 \\ \frac{dcc}{dt} &= k_f \left( \frac{Py_2\phi_1(cc)}{\phi_1(cc)P + \phi_{-1}(cc)} \right)^4 - \frac{V_p cc^2}{K_p^2 + cc^2} + J_{leak}\end{aligned}$$

**3 state:**

$$\begin{aligned}\frac{dx}{dt} &= \phi_{-1}(cc) \cdot y - P\phi_1(cc) \cdot x + \phi_3(cc)(1 - x - y) \\ \frac{dy}{dt} &= P\phi_1(cc) \cdot x - \phi_{-1}(cc) \cdot y - \phi_2(cc)y \\ \frac{dcc}{dt} &= k_f y^4 - \frac{V_p cc^2}{K_p^2 + cc^2} + J_{leak}\end{aligned}$$

$$\begin{aligned}\phi_1(cc) &= \frac{(k_1 R_1 + r_2 cc)}{R_1 + cc} \\ \phi_{-1}(cc) &= \frac{(k_{-1} + r_{-2})R_3}{R_3 + cc} \\ \phi_2(cc) &= \frac{(k_2 R_3 + r_4 cc)}{R_3 + cc} \\ \phi_3(cc) &= \frac{(k_3 R_5 + r_6 cc)}{R_5 + cc}\end{aligned}$$

| parameter  | original value     |
|------------|--------------------|
| $R_1$      | $6 \mu M$          |
| $r_2$      | $100 s^{-1}$       |
| $R_3$      | $50 \mu M$         |
| $r_4$      | $20 s^{-1}$        |
| $R_5$      | $1.6 \mu M$        |
| $r_6$      | $0 s^{-1}$         |
| $r_{-2}$   | $0 s^{-1}$         |
| $k_1$      | $0 s^{-1}$         |
| $k_2$      | $0.53 s^{-1}$      |
| $k_3$      | $1 s^{-1}$         |
| $k_{-1}$   | $0.88 s^{-1}$      |
| $k_f$      | $28 \mu M s^{-1}$  |
| $V_p$      | $1.2 \mu M s^{-1}$ |
| $J_{leak}$ | $0.2 \mu M s^{-1}$ |
| $p K_p$    | $0.18 \mu M$       |
| $P^*$      | $0.47 u.l.$        |

|     | variable | init. cond.  |
|-----|----------|--------------|
| SB2 | $y_2$    | $0.846 u.l.$ |
|     | $cc$     | $0.15 \mu M$ |
| SB3 | $x$      | $0.4 u.l.$   |
|     | $y$      | $0.446 u.l.$ |
|     | $cc$     | $0.15 \mu M$ |

Table 8: SB2 and SB3 reference parameter values (left) and initial conditions (right) from [5]

## 1.9 Hybrid AT1-based and LR1-based models

The 11 hybrid models are listed below, following the numbering scheme in the paper, with the AT1-based hybrid given first and the corresponding LR1-based hybrid given second. The specific modification is explained and the modified term is marked with an asterisk.

### Hybrid 1

- AT1: replaced the hyperbolic function in  $J_{cc}$  by a Hill function of coefficient 2.

$$\begin{aligned}\frac{dn}{dt} &= \frac{1}{\tau_n} \cdot (n_{inf}(cc) - n) \\ \frac{dp}{dt} &= ir \cdot (p_{st} - p) \\ \frac{dcer}{dt} &= J_{cc} - J_{IP3} \\ \frac{dcc}{dt} &= J_{IP3} - J_{cc} + \delta(J_{in} - J_{out})\end{aligned}$$

$$\begin{aligned}J_{cc}^* &= \frac{\gamma_2 \cdot cc^2}{k_{\gamma_2} + cc^2} \\ J_{IP3} &= k_{flux} \mu(p) \cdot n \left( b + \frac{V_1 cc}{k_1 + cc} \right) (\gamma \cdot cer - cc) \\ J_{in} &= \beta_1 + \beta_2 \cdot p_{st} \\ J_{out} &= \frac{\gamma_1 cc^2}{k_{\gamma_1}^2 + cc^2} \\ n_{inf}(cc) &= 1 - \frac{cc^2}{k_2^2 + cc^2} \\ \mu(p) &= \mu_0 + \frac{\mu_1 \cdot p}{k_\mu + p}\end{aligned}$$

- LR1 version: replaced the Hill function in  $J_{cc}$  by a hyperbolic one.

$$\begin{aligned}\frac{dn}{dt} &= A(K_d - (cc + K_d) \cdot n) \\ \frac{dp}{dt} &= ir \cdot (p_{st} - p) \\ \frac{dcer}{dt} &= J_{cc} - J_{IP3} - J_{noIP3} \\ \frac{dcc}{dt} &= J_{IP3} + J_{noIP3} - J_{cc} + eps \cdot (J_{in} - J_{out})\end{aligned}$$



$$\begin{aligned}
J_{cc}^* &= \frac{V_e cc}{K_e + cc} \\
J_{IP3} &= P \left( \frac{p \cdot n \cdot cc}{(p + K_i) \cdot (cc + K_a)} \right)^3 \cdot (\sigma^{-1} cer - cc) \\
J_{noIP3} &= L(\sigma^{-1} cer - cc) \\
J_{in} &= \alpha_1 + \alpha_2 \cdot p_{st} \\
J_{out} &= \frac{V_p cc^2}{K_p^2 + cc^2}
\end{aligned}$$

## Hybrid 2

Replaced hyperbolic dependence of  $J_{IP3}$  on  $cc$  by a cubic function as in LR1.

$$\begin{aligned}
\frac{dn}{dt} &= \frac{1}{\tau_n} \cdot (n_{inf}(cc) - n) \\
\frac{dp}{dt} &= ir \cdot (p_{st} - p) \\
\frac{dcer}{dt} &= J_{cc} - J_{IP3} \\
\frac{dcc}{dt} &= J_{IP3} - J_{cc} + \delta(J_{in} - J_{out}) \\
J_{cc} &= \frac{\gamma_2 \cdot cc}{k_{\gamma_2} + cc} \\
J_{IP3}^* &= k_{flux} \mu(p) \cdot n \left( b + \frac{V_1 cc}{k_1 + cc} \right)^3 (\gamma \cdot cer - cc) \\
J_{in} &= \beta_1 + \beta_2 \cdot p_{st} \\
J_{out} &= \frac{\gamma_1 cc^2}{k_{\gamma_1}^2 + cc^2} \\
n_{inf}(cc) &= 1 - \frac{cc^2}{k_2^2 + cc^2} \\
\mu(p) &= \mu_0 + \frac{\mu_1 \cdot p}{k_\mu + p}
\end{aligned}$$

- LR1 version: replace the cubic dependence of  $J_{IP3}$  on  $cc$  by a linear one.

$$\begin{aligned}
\frac{dn}{dt} &= A(K_d - (cc + K_d) \cdot n) \\
\frac{dp}{dt} &= ir \cdot (p_{st} - p) \\
\frac{dcer}{dt} &= J_{cc} - J_{IP3} - J_{noIP3} \\
\frac{dcc}{dt} &= J_{IP3} + J_{noIP3} - J_{cc} + eps \cdot (J_{in} - J_{out})
\end{aligned}$$

$$\begin{aligned}
J_{cc} &= \frac{V_e cc^2}{K_e^2 + cc^2} \\
J_{IP3*} &= P \left( \frac{p}{(p + K_i)} \right)^3 \left( \frac{cc}{(cc + K_a)} \right) n^3 \cdot (\sigma^{-1} cer - cc) \\
J_{noIP3} &= L(\sigma^{-1} cer - cc) \\
J_{in} &= \alpha_1 + \alpha_2 \cdot p_{st} \\
J_{out} &= \frac{V_p cc^2}{K_p^2 + cc^2}
\end{aligned}$$

### Hybrid 3

Did the same thing as in Hybrid 2 but for IP<sub>3</sub>, using the term  $\mu(p)^3$

$$\begin{aligned}
\frac{dn}{dt} &= \frac{1}{\tau_n} \cdot (n_{inf}(cc) - n) \\
\frac{dp}{dt} &= ir \cdot (p_{st} - p) \\
\frac{dcer}{dt} &= J_{cc} - J_{IP3} \\
\frac{dcc}{dt} &= J_{IP3} - J_{cc} + \delta(J_{in} - J_{out}) \\
J_{cc} &= \frac{\gamma_2 \cdot cc}{k_{\gamma_2} + cc} \\
J_{IP3*} &= k_{flux} \mu(p)^3 \cdot n \left( b + \frac{V_1 cc}{k_1 + cc} \right) (\gamma \cdot cer - cc) \\
J_{in} &= \beta_1 + \beta_2 \cdot p_{st} \\
J_{out} &= \frac{\gamma_1 cc^2}{k_{\gamma_1}^2 + cc^2} \\
n_{inf}(cc) &= 1 - \frac{cc^2}{k_2^2 + cc^2} \\
\mu(p) &= \mu_0 + \frac{\mu_1 \cdot p}{k_\mu + p}
\end{aligned}$$

- LR1 version: replace the cubic dependence of  $J_{IP3}$  on  $p$  by a linear one.

$$\begin{aligned}
\frac{dn}{dt} &= A(K_d - (cc + K_d) \cdot n) \\
\frac{dp}{dt} &= ir \cdot (p_{st} - p) \\
\frac{dcer}{dt} &= J_{cc} - J_{IP3} - J_{noIP3} \\
\frac{dcc}{dt} &= J_{IP3} + J_{noIP3} - J_{cc} + eps \cdot (J_{in} - J_{out})
\end{aligned}$$

$$\begin{aligned}
J_{cc} &= \frac{V_e c c^2}{K_e^2 + c c^2} \\
J_{IP3*} &= P \left( \frac{p}{(p + K_i)} \right) \left( \frac{c c}{(c c + K_a)} \right)^3 n^3 \cdot (\sigma^{-1} c e r - c c) \\
J_{noIP3} &= L(\sigma^{-1} c e r - c c) \\
J_{in} &= \alpha_1 + \alpha_2 \cdot p_{st} \\
J_{out} &= \frac{V_p c c^2}{K_p^2 + c c^2}
\end{aligned}$$

#### Hybrid 4

Replaced the linear dependence of  $J_{IP3}$  on  $n$  by a cubic one.

$$\begin{aligned}
\frac{dn}{dt} &= \frac{1}{\tau_n} \cdot (n_{inf}(cc) - n) \\
\frac{dp}{dt} &= i r \cdot (p_{st} - p) \\
\frac{dcer}{dt} &= J_{cc} - J_{IP3} \\
\frac{dcc}{dt} &= J_{IP3} - J_{cc} + \delta(J_{in} - J_{out})
\end{aligned}$$

$$\begin{aligned}
J_{cc} &= \frac{\gamma_2 \cdot c c}{k_{\gamma_2} + c c} \\
J_{IP3*} &= k_{flux} \mu(p) \cdot n^3 \left( b + \frac{V_1 c c}{k_1 + c c} \right) (\gamma \cdot c e r - c c) \\
J_{in} &= \beta_1 + \beta_2 \cdot p_{st} \\
J_{out} &= \frac{\gamma_1 c c^2}{k_{\gamma_1}^2 + c c^2} \\
n_{inf}(cc) &= 1 - \frac{c c^2}{k_2^2 + c c^2} \\
\mu(p) &= \mu_0 + \frac{\mu_1 \cdot p}{k_\mu + p}
\end{aligned}$$

- LR1 version: replace the cubic dependence of  $J_{IP3}$  on  $n$  by a linear one.

$$\begin{aligned}
\frac{dn}{dt} &= A(K_d - (c c + K_d) \cdot n) \\
\frac{dp}{dt} &= i r \cdot (p_{st} - p) \\
\frac{dcer}{dt} &= J_{cc} - J_{IP3} - J_{noIP3} \\
\frac{dcc}{dt} &= J_{IP3} + J_{noIP3} - J_{cc} + eps \cdot (J_{in} - J_{out})
\end{aligned}$$

$$\begin{aligned}
J_{cc} &= \frac{V_e cc^2}{K_e^2 + cc^2} \\
J_{IP3*} &= P \left( \frac{p}{(p + K_i)} \right)^3 \left( \frac{cc}{(cc + K_a)} \right)^3 n \cdot (\sigma^{-1} cer - cc) \\
J_{noIP3} &= L(\sigma^{-1} cer - cc) \\
J_{in} &= \alpha_1 + \alpha_2 \cdot p_{st} \\
J_{out} &= \frac{V_p cc^2}{K_p^2 + cc^2}
\end{aligned}$$

### Hybrid 5

- AT1: combine the changes in Hybrids 2, 3 and 4.

$$\begin{aligned}
\frac{dn}{dt} &= \frac{1}{\tau_n} \cdot (n_{inf}(cc) - n) \\
\frac{dp}{dt} &= ir \cdot (p_{st} - p) \\
\frac{dcer}{dt} &= J_{cc} - J_{IP3} \\
\frac{dcc}{dt} &= J_{IP3} - J_{cc} + \delta(J_{in} - J_{out})
\end{aligned}$$

$$\begin{aligned}
J_{cc} &= \frac{\gamma_2 \cdot cc}{k_{\gamma_2} + cc} \\
J_{IP3*} &= k_{flux} \mu(p)^3 \cdot n^3 \left( b + \frac{V_1 cc}{k_1 + cc} \right)^3 (\gamma \cdot cer - cc) \\
J_{in} &= \beta_1 + \beta_2 \cdot p_{st} \\
J_{out} &= \frac{\gamma_1 cc^2}{k_{\gamma_1}^2 + cc^2} \\
n_{inf}(cc) &= 1 - \frac{cc^2}{k_2^2 + cc^2} \\
\mu(p) &= \mu_0 + \frac{\mu_1 \cdot p}{k_\mu + p}
\end{aligned}$$

- LR1 version: combine the changes in Hybrids 2, 3 and 4.

$$\begin{aligned}
\frac{dn}{dt} &= A(K_d - (cc + K_d) \cdot n) \\
\frac{dp}{dt} &= ir \cdot (p_{st} - p) \\
\frac{dcer}{dt} &= J_{cc} - J_{IP3} - J_{noIP3} \\
\frac{dcc}{dt} &= J_{IP3} + J_{noIP3} - J_{cc} + eps \cdot (J_{in} - J_{out})
\end{aligned}$$

$$\begin{aligned}
J_{cc} &= \frac{V_e cc^2}{K_e^2 + cc^2} \\
J_{IP3*} &= P \left( \frac{p}{(p + K_i)} \right) \left( \frac{cc}{(cc + K_a)} \right) n \cdot (\sigma^{-1} cer - cc) \\
J_{noIP3} &= L(\sigma^{-1} cer - cc) \\
J_{in} &= \alpha_1 + \alpha_2 \cdot p_{st} \\
J_{out} &= \frac{V_p cc^2}{K_p^2 + cc^2}
\end{aligned}$$

### Hybrid 6

- AT1 version: starting with Hybrid 5, set  $b = 0$  and  $\mu_0 = 0$

$$\begin{aligned}
\frac{dn}{dt} &= \frac{1}{\tau_n} \cdot (n_{inf}(cc) - n) \\
\frac{dp}{dt} &= ir \cdot (p_{st} - p) \\
\frac{dcer}{dt} &= J_{cc} - J_{IP3} \\
\frac{dcc}{dt} &= J_{IP3} - J_{cc} + \delta(J_{in} - J_{out})
\end{aligned}$$

$$\begin{aligned}
J_{cc} &= \frac{\gamma_2 \cdot cc}{k_{\gamma_2} + cc} \\
J_{IP3*} &= k_{flux} \mu(p)^3 \cdot n^3 \left( \frac{V_1 cc}{k_1 + cc} \right)^3 (\gamma \cdot cer - cc) \\
J_{in} &= \beta_1 + \beta_2 \cdot p_{st} \\
J_{out} &= \frac{\gamma_1 cc^2}{k_{\gamma_1}^2 + cc^2} \\
n_{inf}(cc) &= 1 - \frac{cc^2}{k_2^2 + cc^2} \\
\mu(p)* &= \frac{\mu_1 \cdot p}{k_\mu + p}
\end{aligned}$$

- LR1 version: starting with Hybrid 5, add  $\mu_0$  and  $b$  to  $J_{IP3}$

$$\begin{aligned}
\frac{dn}{dt} &= A(K_d - (cc + K_d) \cdot n) \\
\frac{dp}{dt} &= ir \cdot (p_{st} - p) \\
\frac{dcer}{dt} &= J_{cc} - J_{IP3} - J_{noIP3} \\
\frac{dcc}{dt} &= J_{IP3} + J_{noIP3} - J_{cc} + eps \cdot (J_{in} - J_{out})
\end{aligned}$$

$$\begin{aligned}
J_{cc} &= \frac{V_e cc^2}{K_e^2 + cc^2} \\
J_{IP3*} &= P \left( \mu_0 + \frac{p}{(p + K_i)} \right) \left( b + \frac{cc}{(cc + K_a)} \right) n \cdot (\sigma^{-1} cer - cc) \\
J_{noIP3} &= L(\sigma^{-1} cer - cc) \\
J_{in} &= \alpha_1 + \alpha_2 \cdot p_{st} \\
J_{out} &= \frac{V_p cc^2}{K_p^2 + cc^2}
\end{aligned}$$

### Hybrid 7

- AT1 version: assumed a hyperbolic function for  $n_{inf}(cc)$

$$\begin{aligned}
\frac{dn}{dt} &= \frac{1}{\tau_n} \cdot (n_{inf}(cc) - n) \\
\frac{dp}{dt} &= ir \cdot (p_{st} - p) \\
\frac{dcer}{dt} &= J_{cc} - J_{IP3} \\
\frac{dcc}{dt} &= J_{IP3} - J_{cc} + \delta(J_{in} - J_{out})
\end{aligned}$$

$$\begin{aligned}
J_{cc} &= \frac{\gamma_2 \cdot cc}{k_{\gamma_2} + cc} \\
J_{IP3} &= k_{flux} \mu(p) \cdot n \left( b + \frac{V_1 cc}{k_1 + cc} \right) (\gamma \cdot cer - cc) \\
J_{in} &= \beta_1 + \beta_2 \cdot p_{st} \\
J_{out} &= \frac{\gamma_1 cc^2}{k_{\gamma_1}^2 + cc^2} \\
n_{inf}(cc)* &= 1 - \frac{cc}{k_2 + cc} \\
\mu(p) &= \mu_0 + \frac{\mu_1 \cdot p}{k_\mu + p}
\end{aligned}$$

- LR1 version: assumed a Hill function term in  $dn/dt$

$$\begin{aligned}
\frac{dn}{dt}* &= A \left( \left( 1 - \frac{cc^2}{K_d^2 + cc^2} \right) - n \right) \\
\frac{dp}{dt} &= ir \cdot (p_{st} - p) \\
\frac{dcer}{dt} &= J_{cc} - J_{IP3} - J_{noIP3} \\
\frac{dcc}{dt} &= J_{IP3} + J_{noIP3} - J_{cc} + eps \cdot (J_{in} - J_{out})
\end{aligned}$$

$$\begin{aligned}
J_{cc} &= \frac{V_e cc^2}{K_e^2 + cc^2} \\
J_{IP3} &= P \left( \frac{p \cdot n \cdot cc}{(p + K_i) \cdot (cc + K_a)} \right)^3 \cdot (\sigma^{-1} cer - cc) \\
J_{noIP3} &= L(\sigma^{-1} cer - cc) \\
J_{in} &= \alpha_1 + \alpha_2 \cdot p_{st} \\
J_{out} &= \frac{V_p cc^2}{K_p^2 + cc^2}
\end{aligned}$$

### Hybrid 8

- AT1 version: set  $b = 0$

$$\begin{aligned}
\frac{dn}{dt} &= \frac{1}{\tau_n} \cdot (n_{inf}(cc) - n) \\
\frac{dp}{dt} &= ir \cdot (p_{st} - p) \\
\frac{dcer}{dt} &= J_{cc} - J_{IP3} \\
\frac{dcc}{dt} &= J_{IP3} - J_{cc} + \delta(J_{in} - J_{out})
\end{aligned}$$

$$\begin{aligned}
J_{cc} &= \frac{\gamma_2 \cdot cc}{k_{\gamma_2} + cc} \\
J_{IP3*} &= k_{flux} \mu(p) \cdot n \left( \frac{V_1 cc}{k_1 + cc} \right) (\gamma \cdot cer - cc) \\
J_{in} &= \beta_1 + \beta_2 \cdot p_{st} \\
J_{out} &= \frac{\gamma_1 cc^2}{k_{\gamma_1}^2 + cc^2} \\
n_{inf}(cc) &= 1 - \frac{cc^2}{k_2^2 + cc^2} \\
\mu(p) &= \mu_0 + \frac{\mu_1 \cdot p}{k_\mu + p}
\end{aligned}$$

- LR1 version: add  $\mu_0$  to  $J_{IP3}$

$$\begin{aligned}
\frac{dn}{dt} &= A(K_d - (cc + K_d) \cdot n) \\
\frac{dp}{dt} &= ir \cdot (p_{st} - p) \\
\frac{dcer}{dt} &= J_{cc} - J_{IP3} - J_{noIP3} \\
\frac{dcc}{dt} &= J_{IP3} + J_{noIP3} - J_{cc} + eps \cdot (J_{in} - J_{out})
\end{aligned}$$

$$\begin{aligned}
J_{cc} &= \frac{V_e c c^2}{K_e^2 + c c^2} \\
J_{IP3*} &= P \left( \mu_0 + \frac{p}{(p + K_i)} \right)^3 \left( \frac{c c}{(c c + K_a)} \right)^3 n^3 \cdot (\sigma^{-1} c e r - c c) \\
J_{noIP3} &= L(\sigma^{-1} c e r - c c) \\
J_{in} &= \alpha_1 + \alpha_2 \cdot p_{st} \\
J_{out} &= \frac{V_p c c^2}{K_p^2 + c c^2}
\end{aligned}$$

### Hybrid 9

- AT1 version: set  $\mu_0 = 0$

$$\begin{aligned}
\frac{dn}{dt} &= \frac{1}{\tau_n} \cdot (n_{inf}(cc) - n) \\
\frac{dp}{dt} &= i r \cdot (p_{st} - p) \\
\frac{dcer}{dt} &= J_{cc} - J_{IP3} \\
\frac{dcc}{dt} &= J_{IP3} - J_{cc} + \delta(J_{in} - J_{out})
\end{aligned}$$

$$\begin{aligned}
J_{cc} &= \frac{\gamma_2 \cdot c c}{k_{\gamma_2} + c c} \\
J_{IP3} &= k_{flux} \mu(p) \cdot n \left( b + \frac{V_1 c c}{k_1 + c c} \right) (\gamma \cdot c e r - c c) \\
J_{in} &= \beta_1 + \beta_2 \cdot p_{st} \\
J_{out} &= \frac{\gamma_1 c c^2}{k_{\gamma_1}^2 + c c^2} \\
n_{inf}(cc) &= 1 - \frac{c c^2}{k_2^2 + c c^2} \\
\mu(p)* &= \frac{\mu_1 \cdot p}{k_\mu + p}
\end{aligned}$$

- LR1 version: add  $b$  to  $J_{IP3}$

$$\begin{aligned}
\frac{dn}{dt} &= A(K_d - (c c + K_d) \cdot n) \\
\frac{dp}{dt} &= i r \cdot (p_{st} - p) \\
\frac{dcer}{dt} &= J_{cc} - J_{IP3} - J_{noIP3} \\
\frac{dcc}{dt} &= J_{IP3} + J_{noIP3} - J_{cc} + eps \cdot (J_{in} - J_{out})
\end{aligned}$$



$$\begin{aligned}
J_{cc} &= \frac{V_e cc^2}{K_e^2 + cc^2} \\
J_{IP3*} &= P \left( \frac{p}{(p + K_i)} \right)^3 \left( b + \frac{cc}{(cc + K_a)} \right)^3 n^3 \cdot (\sigma^{-1} cer - cc) \\
J_{noIP3} &= L(\sigma^{-1} cer - cc) \\
J_{in} &= \alpha_1 + \alpha_2 \cdot p_{st} \\
J_{out} &= \frac{V_p cc^2}{K_p^2 + cc^2}
\end{aligned}$$

### Hybrid 10

- AT1 version: set  $b = 0$  and  $\mu_0 = 0$

$$\begin{aligned}
\frac{dn}{dt} &= \frac{1}{\tau_n} \cdot (n_{inf}(cc) - n) \\
\frac{dp}{dt} &= ir \cdot (p_{st} - p) \\
\frac{dcer}{dt} &= J_{cc} - J_{IP3} \\
\frac{dcc}{dt} &= J_{IP3} - J_{cc} + \delta(J_{in} - J_{out}) \\
J_{cc} &= \frac{\gamma_2 \cdot cc}{k_{\gamma_2} + cc} \\
J_{IP3*} &= k_{flux} \mu(p) \cdot n \left( \frac{V_1 cc}{k_1 + cc} \right) (\gamma \cdot cer - cc) \\
J_{in} &= \beta_1 + \beta_2 \cdot p_{st} \\
J_{out} &= \frac{\gamma_1 cc^2}{k_{\gamma_1}^2 + cc^2} \\
n_{inf}(cc) &= 1 - \frac{cc^2}{k_2^2 + cc^2} \\
\mu(p)* &= \frac{\mu_1 \cdot p}{k_\mu + p}
\end{aligned}$$

- LR1 version: add  $\mu_0$  and  $b$  to  $J_{IP3}$

$$\begin{aligned}
\frac{dn}{dt} &= A(K_d - (cc + K_d) \cdot n) \\
\frac{dp}{dt} &= ir \cdot (p_{st} - p) \\
\frac{dcer}{dt} &= J_{cc} - J_{IP3} - J_{noIP3} \\
\frac{dcc}{dt} &= J_{IP3} + J_{noIP3} - J_{cc} + eps \cdot (J_{in} - J_{out})
\end{aligned}$$

$$\begin{aligned}
J_{cc} &= \frac{V_e cc^2}{K_e^2 + cc^2} \\
J_{IP3*} &= P \left( \mu_0 + \frac{p}{(p + K_i)} \right)^3 \left( b + \frac{cc}{(cc + K_a)} \right)^3 n^3 \cdot (\sigma^{-1} cer - cc) \\
J_{noIP3} &= L(\sigma^{-1} cer - cc) \\
J_{in} &= \alpha_1 + \alpha_2 \cdot p_{st} \\
J_{out} &= \frac{V_p cc^2}{K_p^2 + cc^2}
\end{aligned}$$

### Hybrid 11

- AT1 version: include  $J_{noIP3} = L(\gamma \cdot cer - cc)$

$$\begin{aligned}
\frac{dn}{dt} &= \frac{1}{\tau_n} \cdot (n_{inf}(cc) - n) \\
\frac{dp}{dt} &= ir \cdot (p_{st} - p) \\
\frac{dcer}{dt} &= J_{cc} - J_{IP3} - J_{noIP3} \\
\frac{dcc}{dt} &= J_{noIP3} + J_{IP3} - J_{cc} + \delta(J_{in} - J_{out}) \\
\\ 
J_{cc} &= \frac{\gamma_2 \cdot cc}{k_{\gamma_2} + cc} \\
J_{IP3} &= k_{flux} \mu(p) \cdot n \left( b + \frac{V_1 cc}{k_1 + cc} \right) (\gamma \cdot cer - cc) \\
J_{noIP3*} &= L(\gamma \cdot cer - cc) \\
J_{in} &= \beta_1 + \beta_2 \cdot p_{st} \\
J_{out} &= \frac{\gamma_1 cc^2}{k_{\gamma_1}^2 + cc^2} \\
n_{inf}(cc) &= 1 - \frac{cc^2}{k_2^2 + cc^2} \\
\mu(p) &= \mu_0 + \frac{\mu_1 \cdot p}{k_\mu + p}
\end{aligned}$$

- LR1 version: set  $J_{noIP3} = 0$

$$\frac{dn}{dt} = A(K_d - (cc + K_d) \cdot n)$$

$$\frac{dp}{dt} = ir \cdot (p_{st} - p)$$

$$\frac{dcer}{dt} = J_{cc} - J_{IP3} - J_{noIP3}$$

$$\frac{dcc}{dt} = J_{IP3} + J_{noIP3} - J_{cc} + eps \cdot (J_{in} - J_{out})$$

$$J_{cc} = \frac{V_e cc^2}{K_e^2 + cc^2}$$

$$J_{IP3} = P \left( \frac{p \cdot n \cdot cc}{(p + K_i) \cdot (cc + K_a)} \right)^3 \cdot (\sigma^{-1} cer - cc)$$

$$J_{noIP3*} = 0$$

$$J_{in} = \alpha_1 + \alpha_2 \cdot p_{st}$$

$$J_{out} = \frac{V_p cc^2}{K_p^2 + cc^2}$$

## References

- [1] A. Atri, J. Amundson, D. Clapham, and J. Sneyd. A single-pool model for intracellular calcium oscillations and waves in the *Xenopus laevis* oocyte. *Biophys. J.*, 65:1727–39, 1993.
- [2] A. Goldbeter, G. Dupont, and M. J. Berridge. Minimal model for signal-induced  $\text{Ca}^{2+}$  oscillations and for their frequency encoding through protein phosphorylation. *Proc. Natl. Acad. Sci. USA*, 87:1461–5, 1990.
- [3] Y. X. Li and J. Rinzel. Equations for  $\text{InsP}_3$  receptor-mediated  $[\text{Ca}^{2+}]_i$  oscillations derived from a detailed kinetic model: a Hodgkin-Huxley like formalism. *J. Theor. Biol.*, 166:461–73, 1994.
- [4] T. Meyer and L. Stryer. Molecular model for receptor-stimulated calcium spiking. *Proc. Natl. Acad. Sci. USA*, 85:5051–5, 1988.
- [5] J. Sneyd, A. LeBeau, and D. Yule. Traveling waves of calcium in pancreatic acinar cells: model construction and bifurcation analysis. *Physica D*, 145:158–79, 2000.
- [6] J. Sneyd, K. Tsaneva-Atanasova, V. Reznikov, Y. Bai, M. J. Sanderson, and D. I. Yule. A method for determining the dependence of calcium oscillations on inositol trisphosphate oscillations. *Proc. Natl. Acad. Sci. USA*, 103:1675–80, 2006.

## **2 Supplementary Figures**

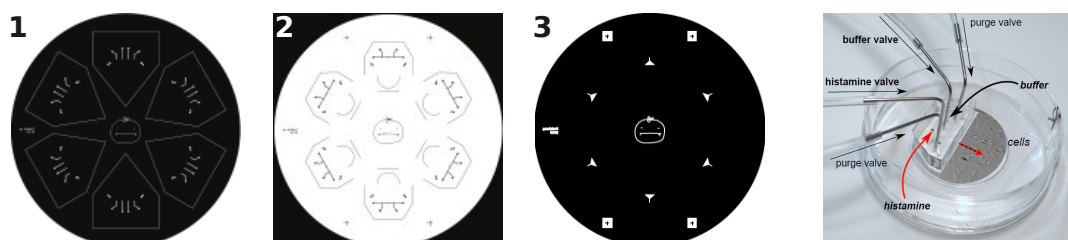

Figure A: Microfluidic device and Chip-In-A-Dish. Left, lithographic masks for the control layer (1) and the two flow layers (2,3), allowing six devices to be made in one operation. When the layers are bonded together, the lines in the control layer overlap with the lines in the flow layer to form the valves. Fiduciary marks are used to align the layers. Right, photograph of a Chip-In-A-Dish (CIAD) which is assembled by bonding a microfluidic device to a glass-bottomed dish, as also shown in Paper Figure 7. Histamine and buffer solutions are pumped in at 5 psig with tubes attached to the indicated holes (these tubes are not shown in the photograph). Valves are controlled by compressed air at 25 psig. With the purge valves closed, alternately opening and closing the buffer and histamine valves creates a series of histamine pulses that flow out of the device and stimulate the cells in the dish.

```
//Macro which selects cells from a UV stack and prepares measure over time: area,mean, st.dev and integral density and so on
//At the end, menu opens to save results in excel format

run("Z Project...", "start=1 stop=300 projection=[Max Intensity]");
run("Subtract Background...", "rolling=10");
run("Sharpen");
setAutoThreshold("Mean");
run("Convert to Mask");
run("Invert");
run("Watershed");
run("Analyze Particles...", "size=16-500 circularity=0.00-1.00 show=Outlines display clear include add");
run("Set Measurements...", "area mean standard integrated redirect=None decimal=0");
```

Figure B: ImageJ macro used for segmentation of cells after imaging.

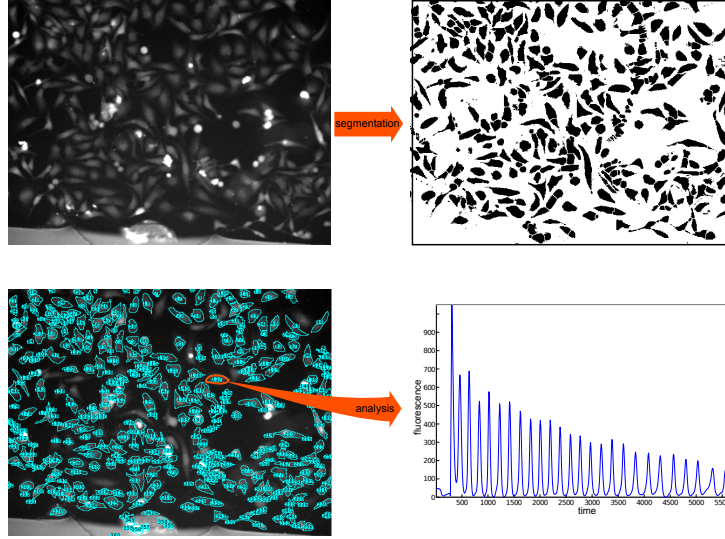

Figure C: Image segmentation and  $\text{Ca}^{2+}$  trajectory generation. All frames are superimposed (top left) to create a binary mask (top right). This mask is segmented to create a set of regions of interest (ROIs) around each cell (bottom left). Integral density is measured in each ROI and background is subtracted, as described in the Methods section of the Paper, to generate the time trajectory of  $\text{Ca}^{2+}$  in the cytoplasm (bottom right).

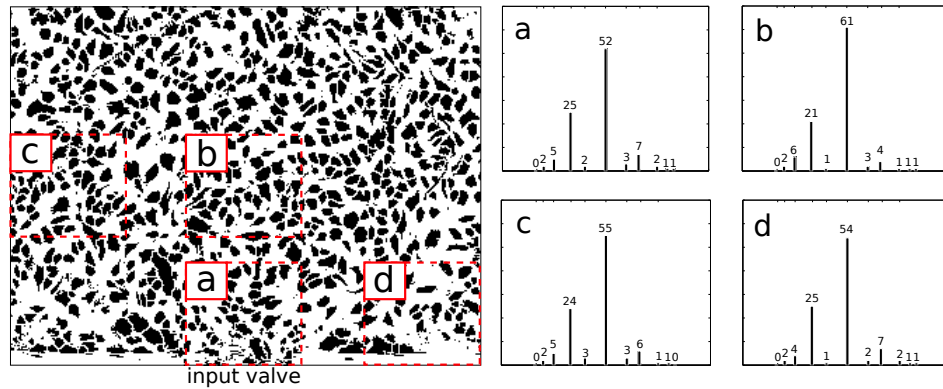

Figure D: Heterogeneity control for CIAD imaging. We measured skipping pattern histograms under pulse stimulation, as shown on the right, in the regions of the CIAD shown on the left. No significant qualitative differences are found between them.

### *spikefilter*

- input = Zspike (spike heights)
- output = binary\_sequence

```
for k = 1:length(Zspike)
```

```
% Define local spikes: four closest neighbours  
mina = max(k-2,1)  
maxa = min(k+2,length(Zspike))  
ind = mina:maxa %index of local spikes
```

```
% Calculate mean and standard deviation of local  
meanlocal = mean(Zspike(ind))  
stdlocal = std(Zspike(ind))
```

```
% Accept or reject spikes: binary sequence  
if Zspike(k) < meanlocal & stdlocal > 0.4*meanlocal  
  
    binary_sequence(k)=0  
  
else  
  
    binary_sequence(k)=1  
  
end if
```

```
end for
```

### *patternsearch*

- input: binary\_sequence
- output = list of patterns

```
Npatterns=0
```

```
% look for [1,0] "promoters"  
for i = 1:length(binary_sequence)-1  
    win = [ binary_sequence(i),binary_sequence(i+1) ]  
  
    if win == [1,0]  
        k = k+1  
        promoter(k) = i %promoter positions  
    end if  
  
end for
```

```
% Analyze patterns within promoters  
maxlength=6 %maximum pattern length allowed  
for i=1:length(promoter)-1  
  
    index = promoter(i)+1:promoter(i+1)  
    sub_sequence = binary_sequence(index)  
  
    Nones=0  
    if length(sub_sequence) <= maxlength  
  
        for j = 1:length(sub_sequence)  
  
            %count ones  
            if sub_sequence(j) == 1  
                Nones = Nones+1  
            end if  
  
        end for  
  
        end if  
  
        Npatterns = Npatterns+1  
        pattern(Npatterns) = Nones/length(sub_sequence)  
  
    end for
```

Figure E: Pseudo-code of the spike filtering (left) and pattern search (right) algorithms.



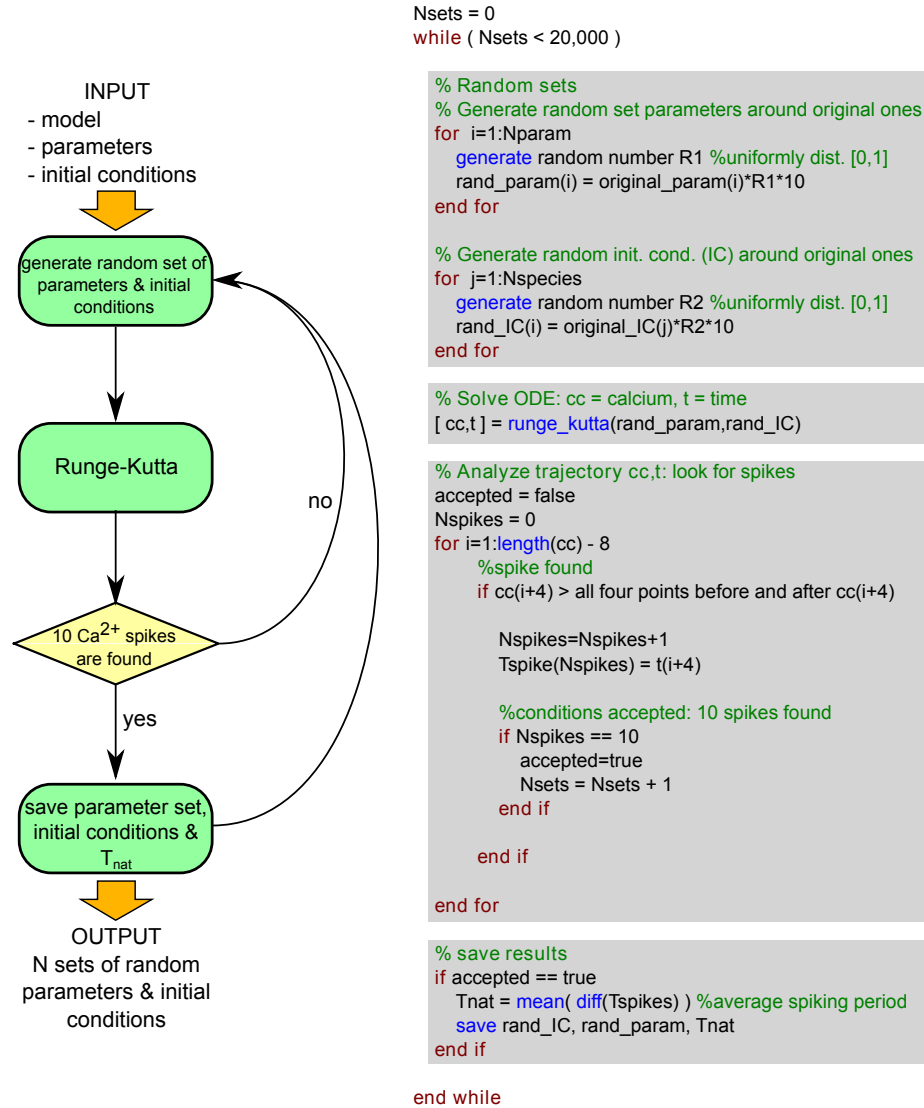

Figure F: Flow chart (left) and pseudo-code (right) for choosing random ICs and PVs and determining the natural period. The pseudo-code illustrates uniform sampling.

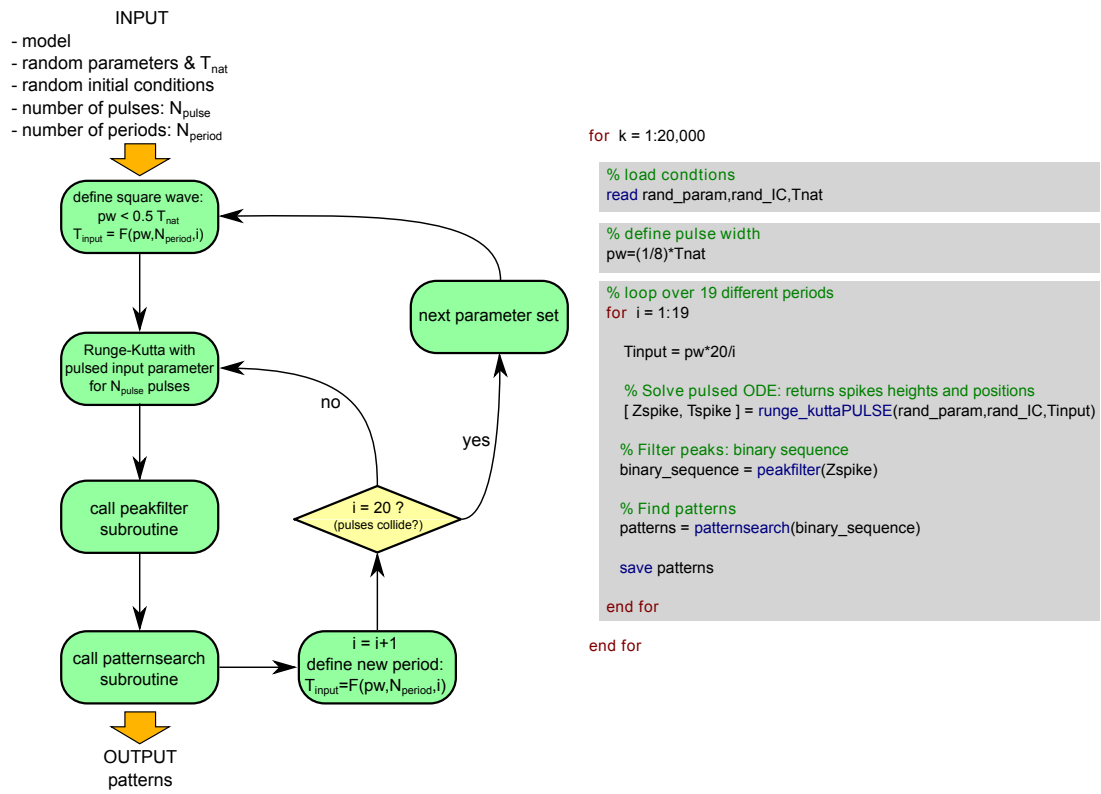

Figure G: Flow chart (left) and pseudo-code (right) for pattern counting.

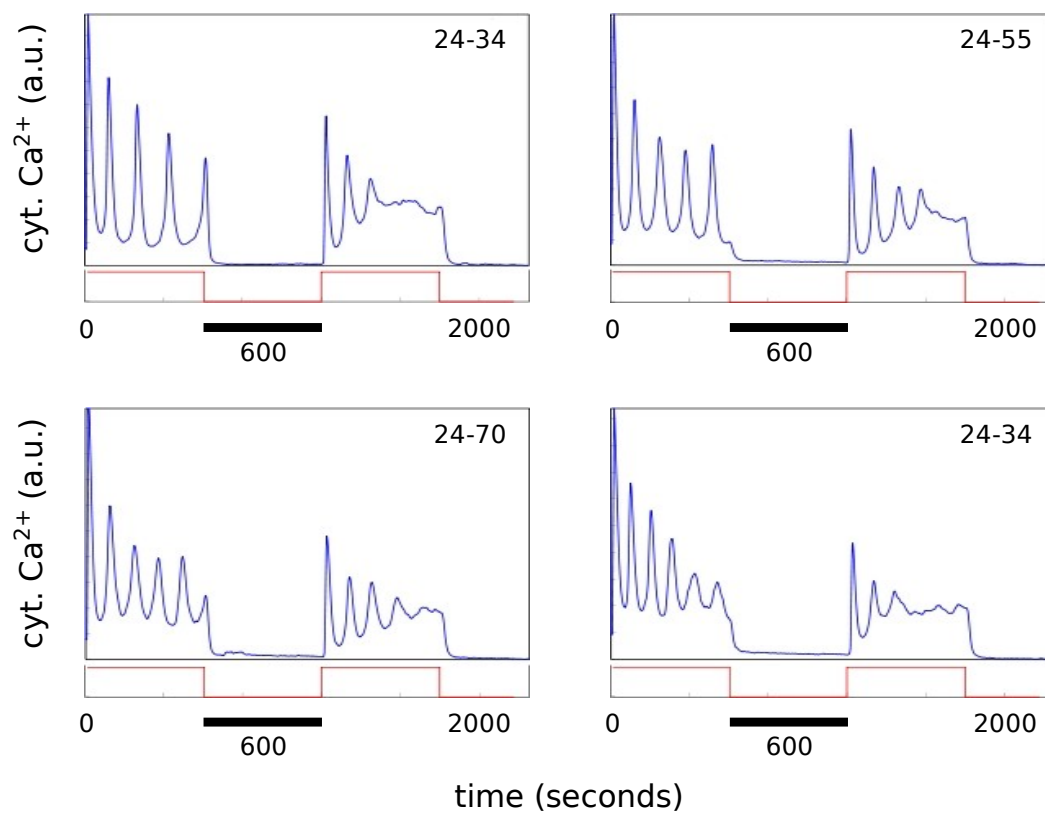

Figure H: Absence of photobleaching. Cells were subjected to two steps of histamine with a gap of 10 minutes between the steps. The response to the second step was similar to that of the first, suggesting that photobleaching was not the dominant reason for the decrease in spike amplitude.

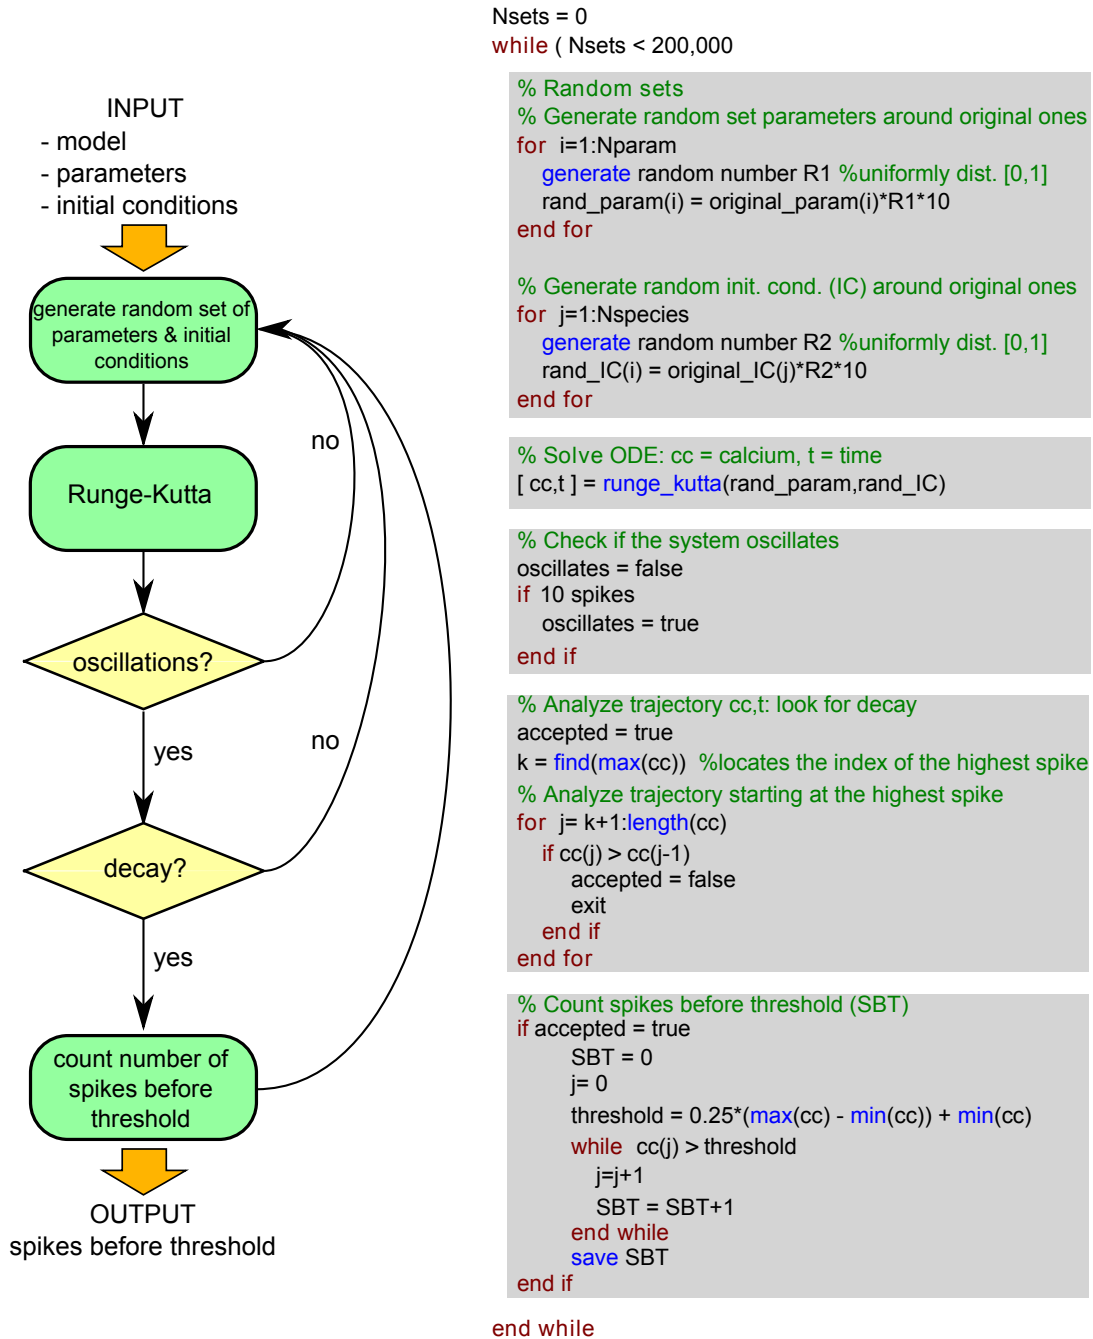

Figure I: Flow chart (left) and pseudo-code (right) for nonlinear amplitude analysis. The pseudo-code illustrates uniform sampling.

uniform sampling

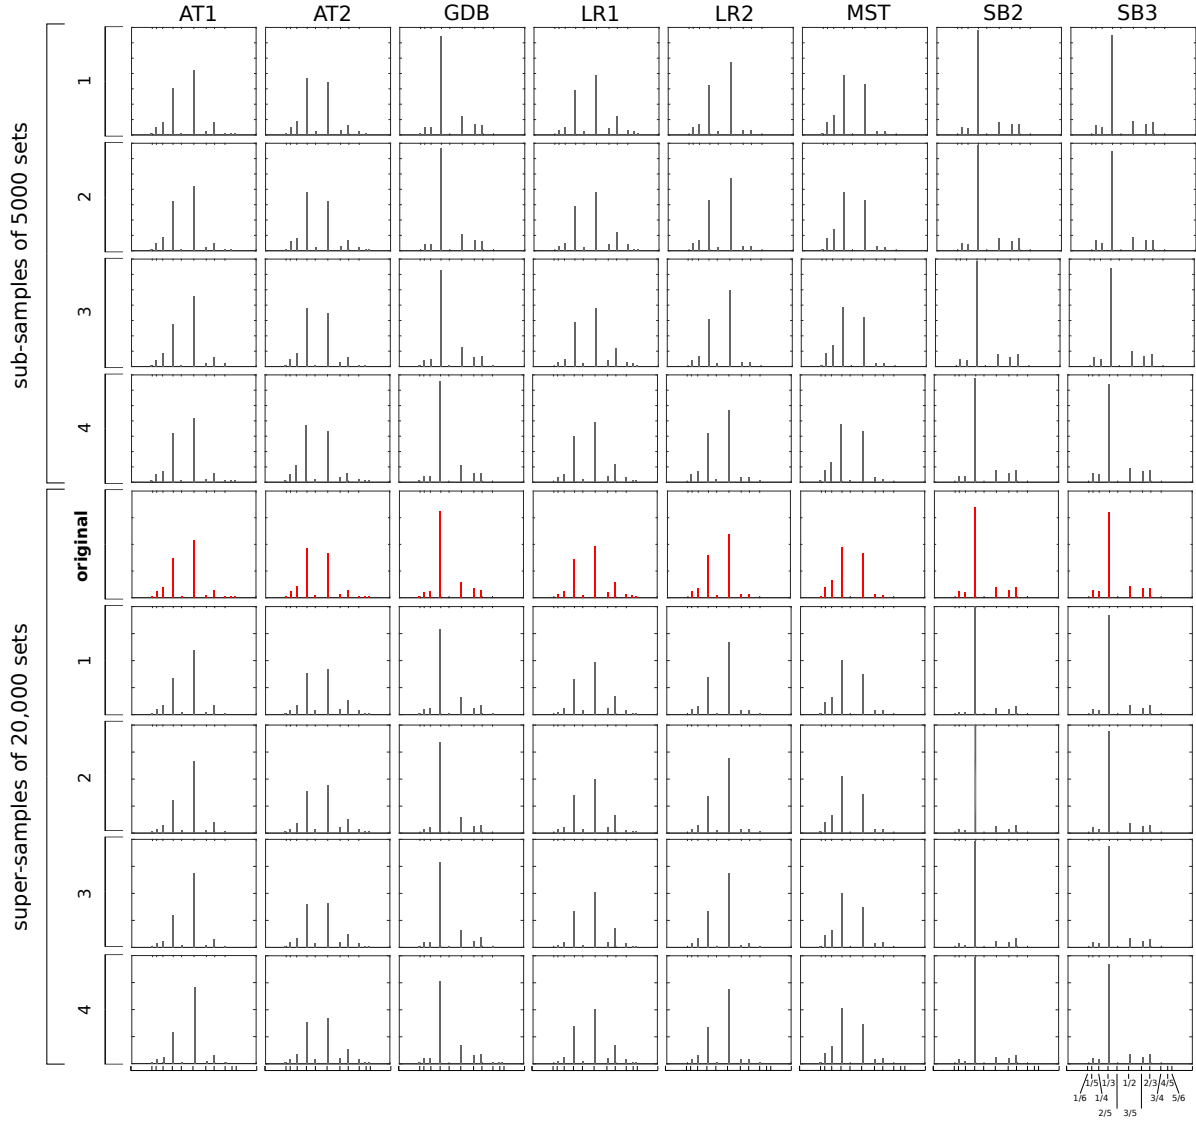

Figure J: Effect of sample size on nonlinear frequency analysis under uniform sampling. Each column corresponds to the model annotated at the top. Each row corresponds to a sample of sets of ICs and PVs. The row in the middle, coloured in red, corresponds to the sample of 20,000 sets used in Paper Figure 5. The four rows above the middle were obtained by random sub-sampling of 5000 sets from among those 20,000 sets. The four rows below the middle were obtained by independently generating further samples of 20,000 sets.

lognormal sampling

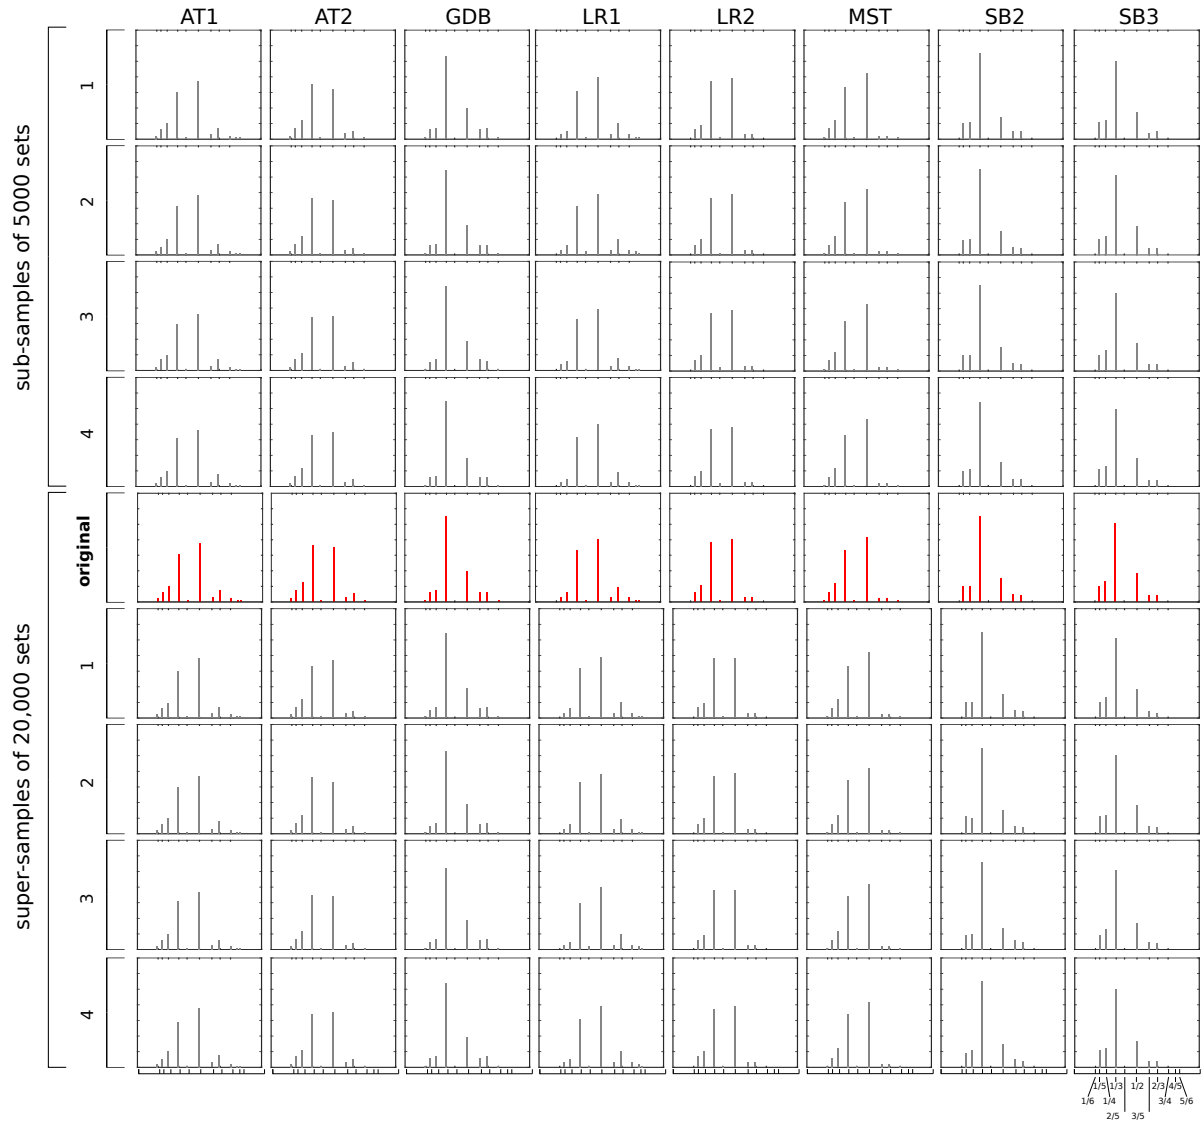

Figure K: Effect of sample size on nonlinear frequency analysis under lognormal sampling, following the same procedure and layout as in Figure J.

uniform sampling

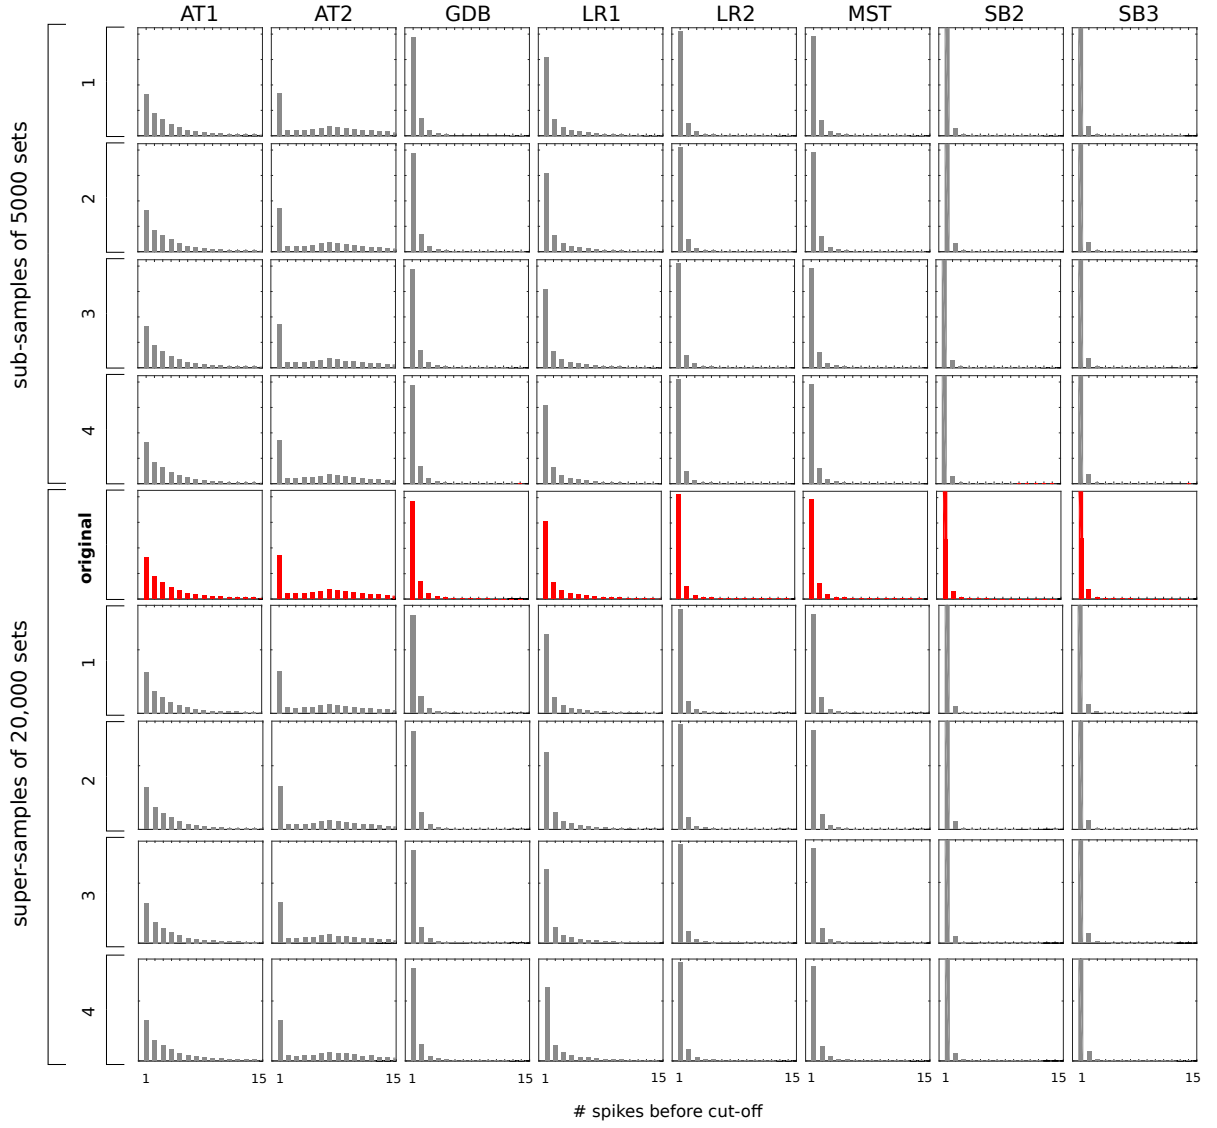

Figure L: Effect of sample size on nonlinear amplitude analysis under uniform sampling, following the same procedure and layout as in Figure J.

lognormal sampling

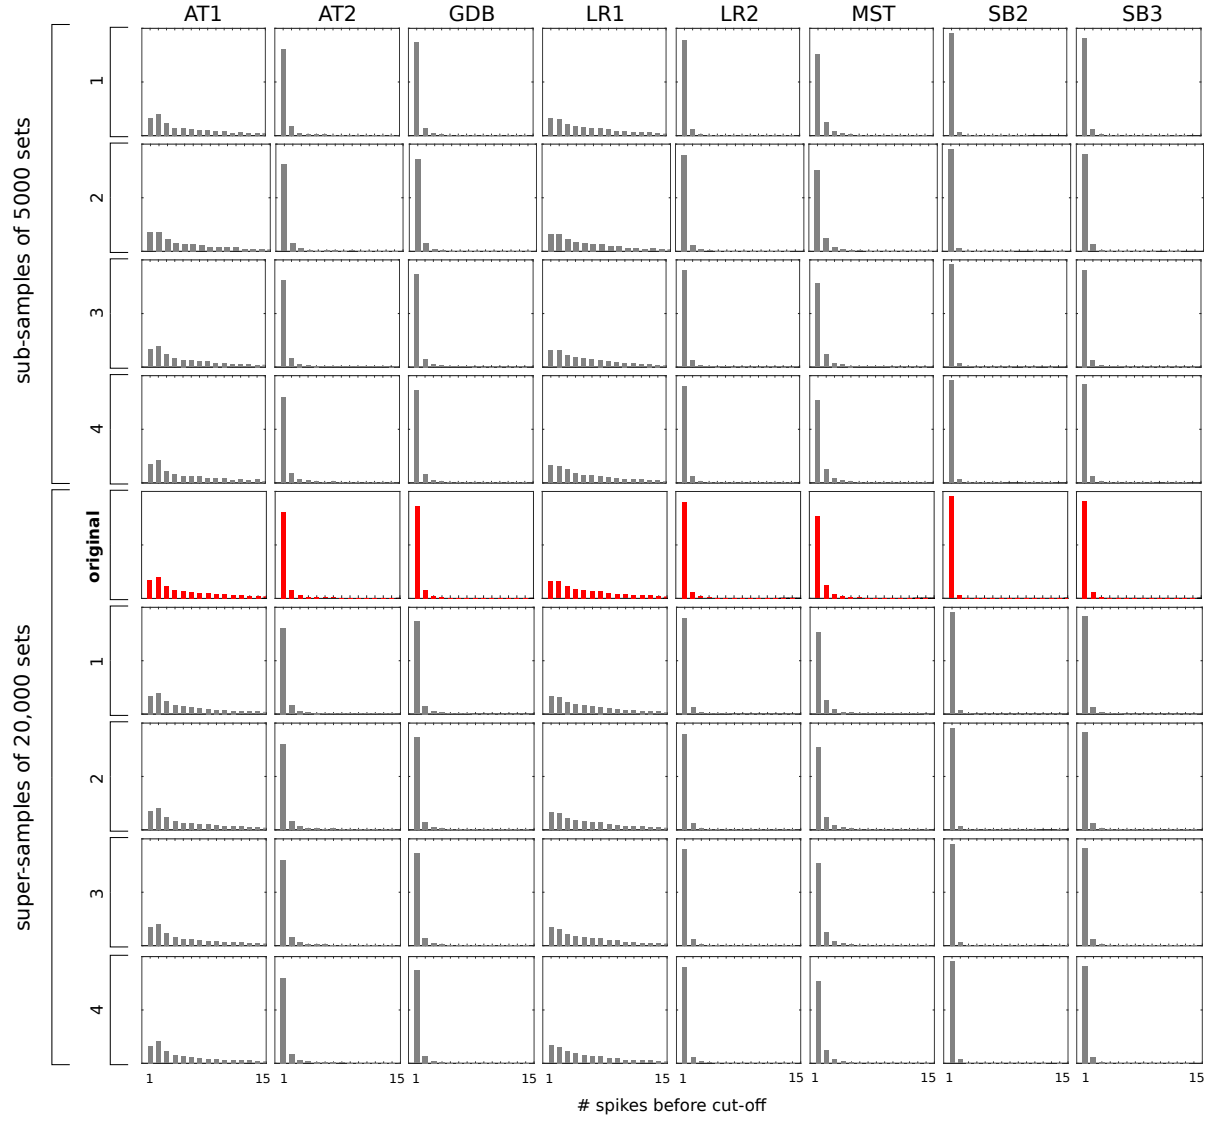

Figure M: Effect of sample size on nonlinear amplitude analysis under lognormal sampling, following the same procedure and layout as in Figure J.
